# Supplementary material for: Long-term aerosol particle depolarization ratio measurements with Halo Doppler lidar
Source: Copernicus journal article supplement (doi:10.5194/amt-2023-37), 2023-03-24
Supplement: Supplementary file 1 [file amt-2023-37-supplement.pdf]

# Supplementary information

## Long-term aerosol particle depolarization ratio measurements with Halo Doppler lidar

5 Viet Le<sup>1</sup>, Hannah Lobo<sup>1</sup>, Ewan J. O'Connor<sup>1</sup>, Ville Vakkari<sup>1,2</sup>

<sup>1</sup>Finnish Meteorological Institute, Helsinki, 00101, Finland

<sup>2</sup>Atmospheric Chemistry Research Group, Chemical Resource Beneficiation, North-West University, Potchefstroom, 2520, South Africa

Correspondence to: Viet Le (viet.le@fmi.fi)

### 10 S1 Saturation at cloud base

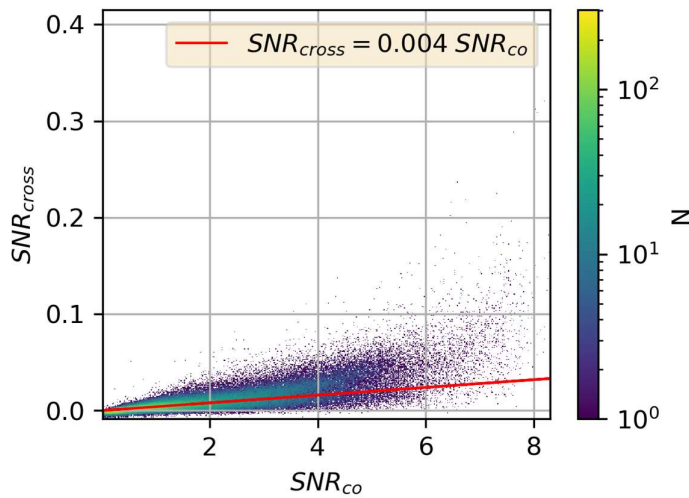

Figure S1:  $SNR_{co}$  and  $SNR_{cross}$  measured by Utö-32XR at the cloud base

### S2 The effect of 2<sup>nd</sup> order polynomial component in background

15 Fig. S2 demonstrates the impact of the background correction to  $\delta_{aerosol}$ . For all the instruments except Sodankylä-54, the background correction increases  $\delta_{aerosol}$ . The increase is higher for aerosol with weaker co-SNR. The effect is negligible for strong aerosol signal with co-SNR larger than 0.01. Table S2 shows the percentage of data affected by this background correction. The effect is most prominent for instruments at Hyytiälä, with 31.8% and 24.6% of the aerosol data that have  $\delta_{aerosol}$  changes by 0.05 for Hyytiälä-33 and Hyytiälä-46 respectively. However, significant changes of  $\delta_{aerosol}$  by 0.1 is only at 9.3% and 7.1% of all the aerosol data for these instruments. This  
20 result shows the importance of background correction in the retrieval of weak aerosol signals. Without it, biases from the 2<sup>nd</sup> order polynomial component in the background would propagate into the  $\delta_{aerosol}$ .

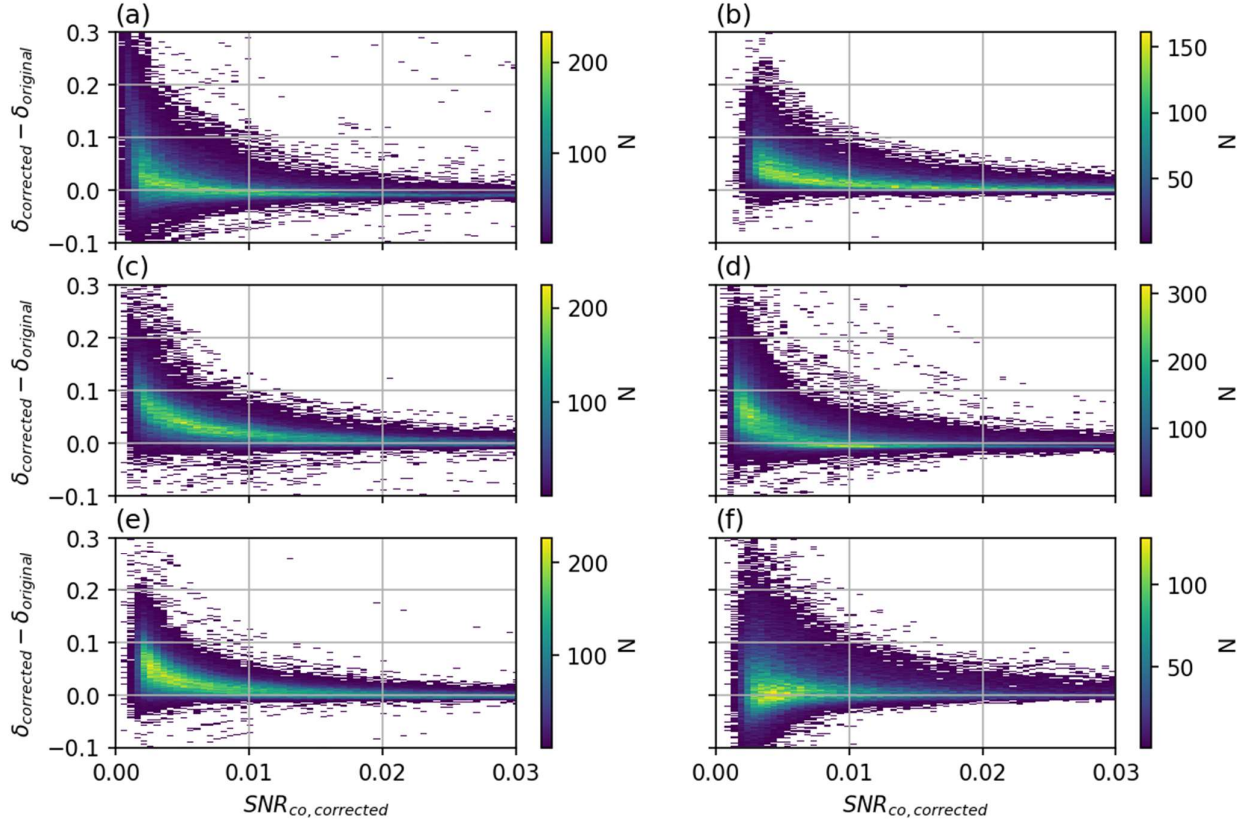

25

Figure S2: Changes in  $\delta_{aerosol}$  resulted from background correction in a) Utö-32, b) Utö-32XR, c) Hyttiälä-33, d) Hyttiälä-46, e) Vehmasmäki-53, f) Sodankylä-54

| Instrument    | $ \delta_{corrected} - \delta_{original}  > 0.05$ | $ \delta_{corrected} - \delta_{original}  > 0.1$ |
|---------------|---------------------------------------------------|--------------------------------------------------|
| Utö-32        | 18.2%                                             | 6.6%                                             |
| Utö-32XR      | 11.0%                                             | 1.9%                                             |
| Hyttiälä-33   | 31.8%                                             | 9.3%                                             |
| Hyttiälä-46   | 24.6%                                             | 7.1%                                             |
| Vehmasmäki-53 | 15.5%                                             | 2.7%                                             |
| Sodankylä-54  | 17.9%                                             | 5.1%                                             |

Table S2: The effect of background correction on number of total data point in each instrument

### S3 Aerosol identification algorithm

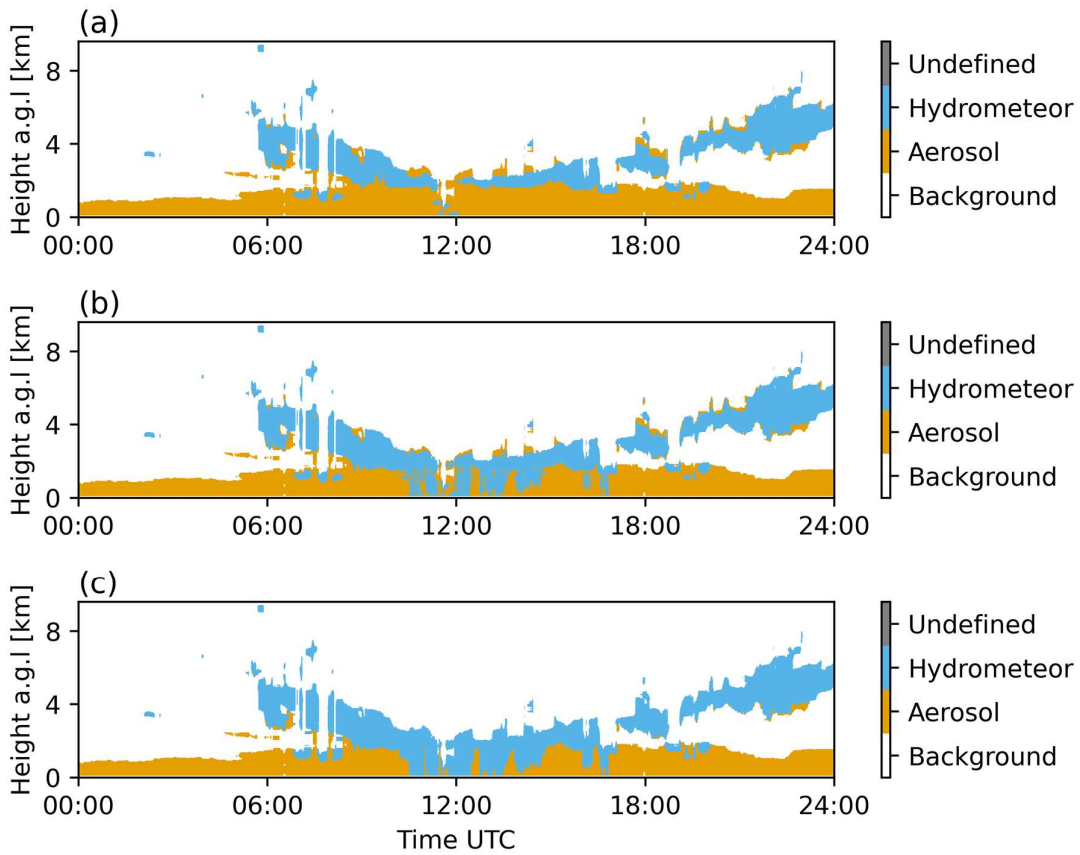

30

Figure S3: Steps of the aerosol identification algorithm for the case presented in Fig. 4 a) Step 1: Preliminary aerosol and hydrometeor detection, b) Step 2: Falling hydrometeor detection, c) Step 3: Attenuation correction

### S4 The effect of relative humidity

35

| Period     | Location   | Slope  | p-value     | R squared |
|------------|------------|--------|-------------|-----------|
| Whole data | Utö        | -0.073 | $< 10^{-3}$ | 0.012     |
|            | Hyytiälä   | -0.14  | $< 10^{-3}$ | 0.105     |
|            | Vehmasmäki | -0.194 | $< 10^{-3}$ | 0.219     |
|            | Sodankylä  | -0.165 | $< 10^{-3}$ | 0.142     |
| May-June   | Utö        | -0.147 | $< 10^{-3}$ | 0.045     |
|            | Hyytiälä   | -0.208 | $< 10^{-3}$ | 0.166     |
|            | Vehmasmäki | -0.169 | $< 10^{-3}$ | 0.145     |
|            | Sodankylä  | -0.127 | $< 10^{-3}$ | 0.057     |

Table S4: Linear regression analysis summary for RH predicting  $\delta_{\text{aerosol}}$

S5 Hyytiälä study case

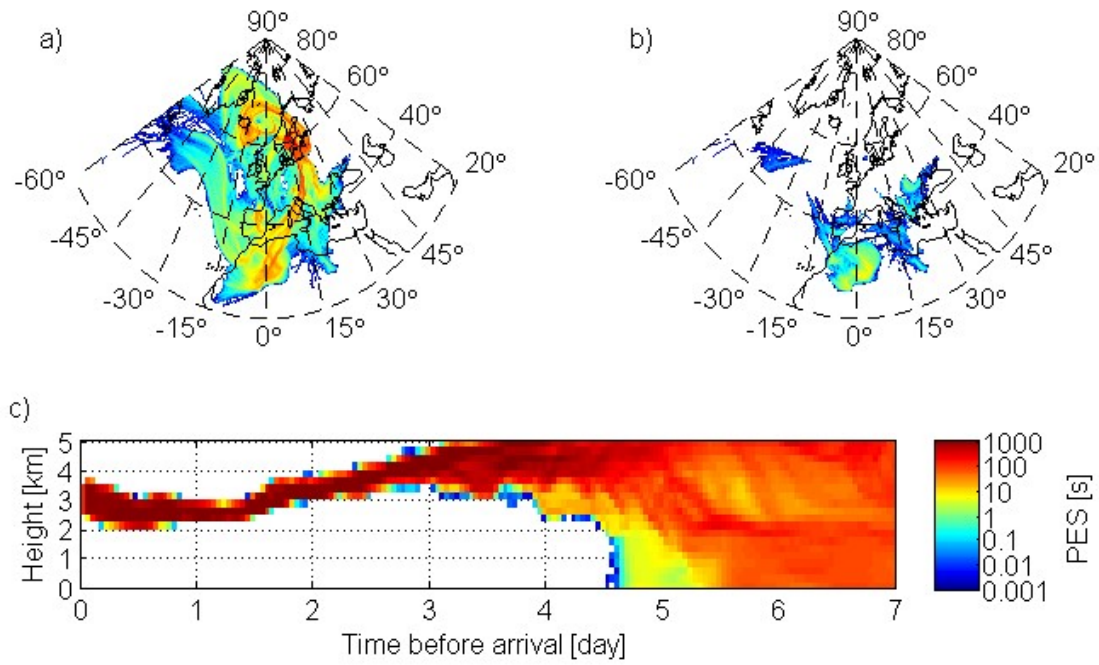

40 Figure S5: Air mass origin for the elevated layer at 2.5-3.5 km a.g.l. observed on 2018-04-15 at Hyytiälä. a) PES summed up for all heights for 7 days before arrival at Hyytiälä. b) Sum of PES in the lowest 500 m a.g.l. for 7 days before arrival at Hyytiälä. c) Vertical distribution of PES in the lowest 5 km a.g.l. for 7 days before arrival at Hyytiälä.

S6 Utö study case

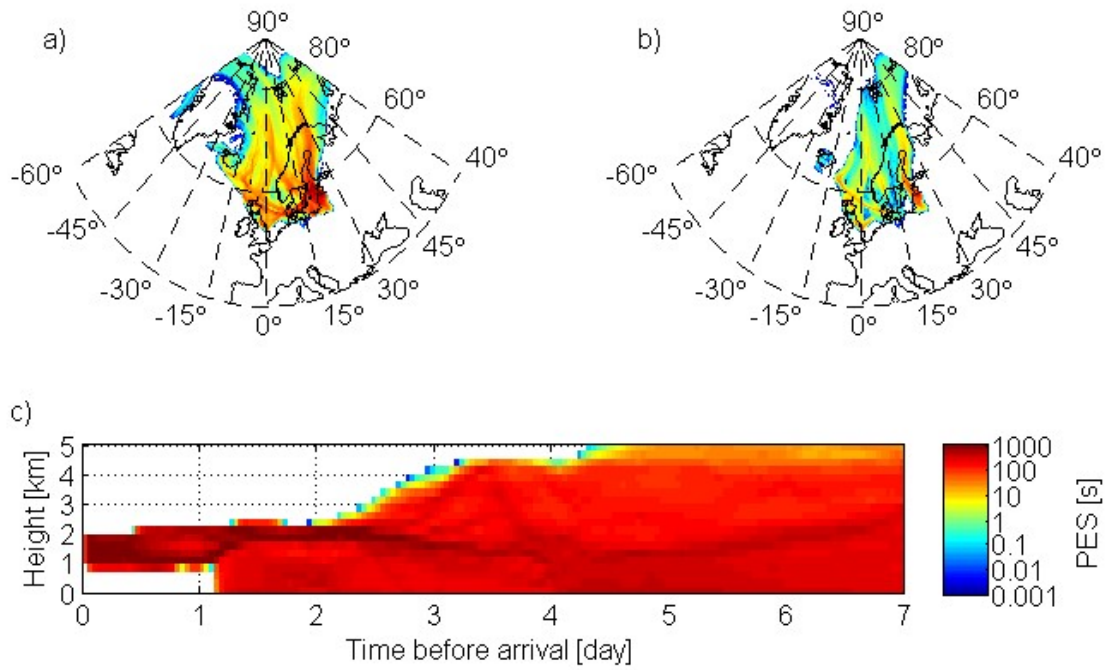

45

**Figure S6: Air mass origin for the elevated layer at 1-2 km a.g.l. observed on 2017-05-13 at 18 UTC at Utö. a) PES summed up for all heights for 7 days before arrival at Utö. b) Sum of PES in the lowest 500 m a.g.l. for 7 days before arrival at Utö. c) Vertical distribution of PES in the lowest 5 km a.g.l. for 7 days before arrival at Utö.**
